# Supplementary material for: Direct writing of flexible two-dimensional MXene arrays for SERS sensing
Source: Royal Society of Chemistry journal article supplement (doi:10.1039/d4tc01880j), 2024-01-01
Supplement: d4tc01880j1.pdf [file d4tc01880j1.pdf]

## Supplementary Information

# Direct writing of flexible two-dimensional MXene arrays for SERS sensing

Leilei Lan,<sup>a</sup> Sen Yang,<sup>a</sup> Guoqun Li,<sup>b</sup> Caiye Zhao,<sup>\*a</sup> Jin Liu,<sup>a</sup> Xiao Tang,<sup>b</sup> Xing Zhao,<sup>b</sup>

Zhongwei Qu,<sup>a</sup> Juan Gao,<sup>a</sup> Xingce Fan<sup>\*b</sup> and Teng Qiu<sup>\*b</sup>

<sup>a</sup> School of Mechanics and Optoelectronic Physics, Anhui University of Science and Technology, Huainan 232001, China

<sup>b</sup> Key Laboratory of Quantum Materials and Devices of Ministry of Education, School of Physics, Southeast University, Nanjing 211189, China

\* Corresponding author.

E-mail address: caiyehao@163.com (C. Zhao), fanxingce@126.com (X. Fan),  
tqiu@seu.edu.cn (T. Qiu)

## **Fabrication of V<sub>2</sub>C ink**

V<sub>2</sub>C MXene ink was prepared by selective etching of Al atomic layers from V<sub>2</sub>AlC MAX phase powder. Typically, 1.0 g V<sub>2</sub>AlC powder was slowly added to 25 mL of etching solution consisting of 10 mL of HF (40 wt%), 10 mL of 12 M HCl, and 5 mL deionized (DI) water. The mixed solution was stirred at 40 °C for 48 h. Afterward, the etched sample was washed several times with DI water until the pH reached 7. We collected the resulting multilayer sediment and stirred it with 25 mL of 5wt% tetramethylammonium hydroxide (TMAOH) for 6 h. Then, the sample was centrifuged at 8500 rpm for 5 min and washed three times with DI water to remove the residual TMAOH. After decanting the supernatant, the V<sub>2</sub>C intercalated sediment was redispersed in 15 mL DI water and ultrasonic treatment for 30 min, followed by centrifugation at 3500 rpm for 10 min to obtain V<sub>2</sub>C ink containing only delaminated nanosheets.

## **Fabrication of Mo<sub>2</sub>C ink**

Mo<sub>2</sub>C MXene ink was prepared by selective etching of Ga atomic layers from Mo<sub>2</sub>Ga<sub>2</sub>C powder. Typically, 1.0 g Mo<sub>2</sub>Ga<sub>2</sub>C powder was slowly added to 10 mL of 49 wt% HF solution. The mixed solution was stirred at 55 °C for 120 h. Afterward, the etched sample was washed several times with DI water until the pH reached 7. We collected the resulting multilayer sediment and stirred it with 25 mL of 5 wt% TMAOH for 24 h at room temperature. Then, the sample was centrifuged at 6000 rpm for 5 min and washed three times with DI water to remove the residual TMAOH. After decanting

the supernatant, the Mo<sub>2</sub>C intercalated sediment was redispersed in 15 mL DI water and ultrasonic treatment for 60 min, followed by centrifugation at 3500 rpm for 10 min to obtain Mo<sub>2</sub>C ink containing only delaminated nanosheets.

## **Fabrication of Nb<sub>2</sub>C ink**

Nb<sub>2</sub>C MXene ink was prepared by selective etching of Al atomic layers from Nb<sub>2</sub>AlC powder. Typically, 1.0 g Nb<sub>2</sub>AlC powder was slowly added to 15 mL of 49 wt% HF solution. The mixed solution was stirred at 50 °C for 72 h. Afterward, the etched sample was washed several times with DI water until the pH reached 7. We collected the resulting multilayer sediment and stirred it with 25 mL of 20 wt% TMAOH for 24 h at room temperature. Then, the sample was centrifuged at 8000 rpm for 5 min and washed three times with DI water to remove the residual TMAOH. After decanting the supernatant, the Nb<sub>2</sub>C intercalated sediment was redispersed in 15 mL DI water and ultrasonic treatment for 30 min, followed by centrifugation at 3500 rpm for 10 min to obtain Nb<sub>2</sub>C ink containing only delaminated nanosheets.

## **Fabrication of Ag substrates**

Ag substrates were prepared on Si (100) by porous anodic aluminum oxide (AAO) template-assisted evaporation method. The Ag nanoarray was prepared by E-beam evaporation, and the evaporation rate, film thickness and evaporation vacuum were 1 Å/s, 60 nm, and  $4 \times 10^{-4}$  Pa, respectively. Afterwards, the AAO membrane was peeled off from the substrate with tape, leaving patterned Ag nanoarray on the substrate.

## Calculation of the Raman enhancement factors

The Raman enhancement factors (EFs) of the samples could be calculated using the equation below:<sup>1,2</sup>

$$EF = (I_{\text{SERS}}/N_{\text{SERS}}) / (I_{\text{normal}}/N_{\text{normal}}) \quad (\text{S1})$$

$$N_{\text{SERS}} = CVN_A A_{\text{Raman}}/A_{\text{Sub}} \quad (\text{S2})$$

$$N_{\text{normal}} = \rho h A_{\text{Raman}} N_A / M \quad (\text{S3})$$

where  $I_{\text{SERS}}$  and  $I_{\text{normal}}$  are the intensities of the selected Raman peak in the SERS and non-SERS spectra, respectively.  $N_{\text{SERS}}$  and  $N_{\text{normal}}$  are the average number of molecules in scattering area for SERS and non-SERS measurement. The data of bulk R6G is used as non-SERS-active reference.  $C$  is the molar concentration of R6G solution and  $V$  is the volume of the droplet (10  $\mu\text{L}$ ).  $N_A$  is Avogadro constant ( $6.023 \times 10^{23} \text{ mol}^{-1}$ ).  $A_{\text{Raman}}$  is the laser spot area.  $A_{\text{Sub}}$  is the effective area of the substrate, which is approximately  $9 \pi \text{ mm}^2$ . The confocal depth  $h$  of the laser beam is  $\sim 21 \mu\text{m}$ . The molecular weight  $M$  of R6G is  $479 \text{ g mol}^{-1}$  and density  $\rho$  of bulk R6G is  $1.15 \text{ g cm}^{-3}$ .

## Simulation of the electromagnetic field distribution

The finite element method (FEM) simulations are carried out on COMSOL. The modes are excited by a plane wave source with incident direction perpendicular to the plane of structure, the incident light wavelength is 532 nm, and its electric field intensity is 1V/m. The refractive index of  $\text{Ti}_2\text{C}$  under 532 nm laser irradiation are set as  $n(\text{Ti}_2\text{C}) = 1.701 + i 1.753$ . According to the results of SEM, TEM, and XRD,  $\text{Ti}_2\text{C}$  geometric mode is set as follows: 20 layers  $\text{Ti}_2\text{C}$  MXene with a diameter of 1.0  $\mu\text{m}$ , layer thickness of 0.23 nm and inter-layer distance of 1.37 nm.

## Figures

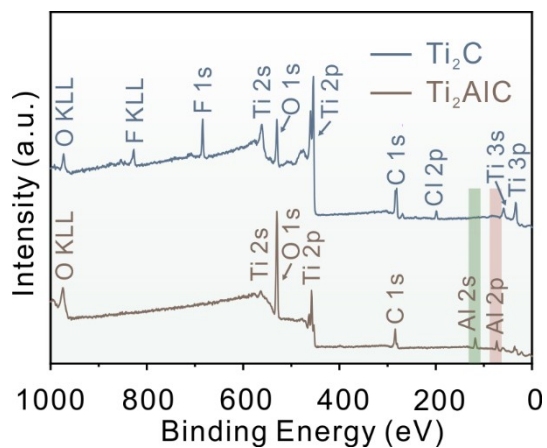

**Fig. S1** Survey XPS spectra of  $\text{Ti}_2\text{AlC}$  and  $\text{Ti}_2\text{C}$  MXene.

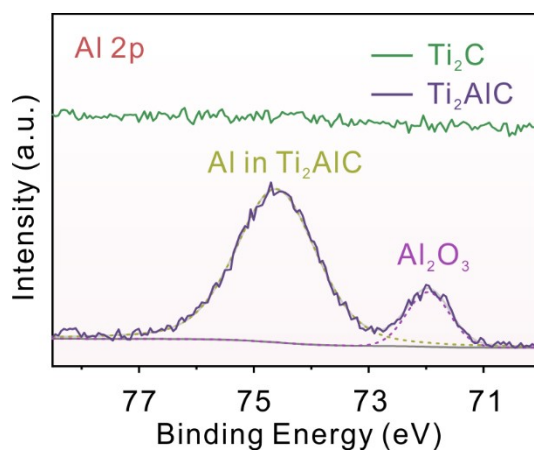

**Fig. S2** Al 2p spectra of  $\text{Ti}_2\text{AlC}$  and  $\text{Ti}_2\text{C}$  MXene.

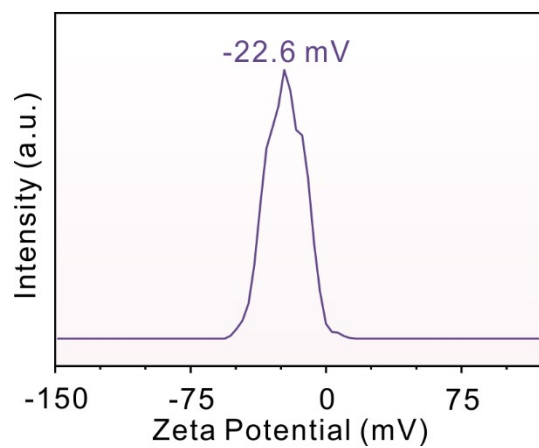

**Fig. S3** Zeta potential distribution curve of Ti<sub>2</sub>C suspension.

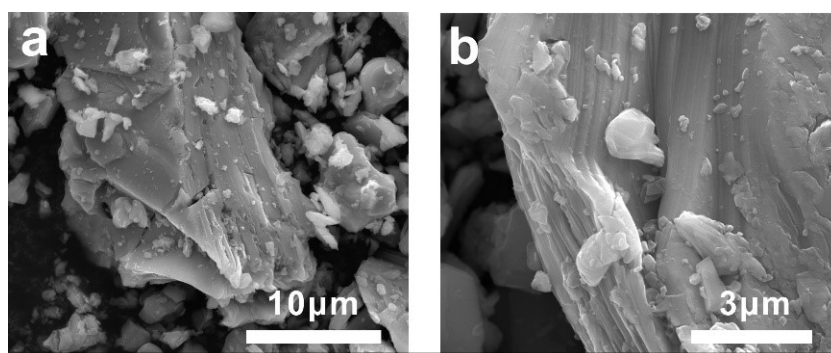

**Fig. S4** SEM images of V<sub>2</sub>AlC powder.

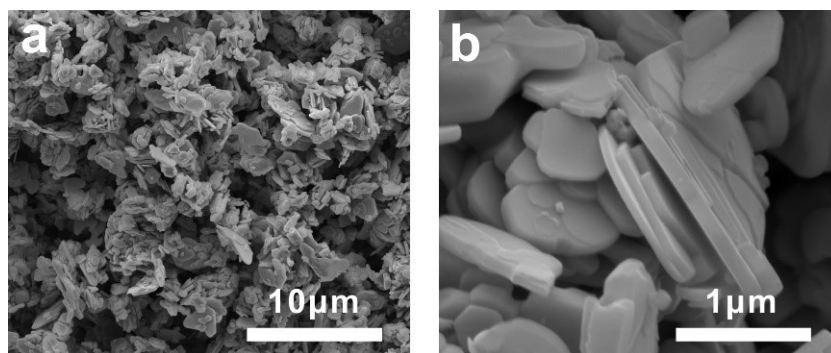

**Fig. S5** SEM images of Mo<sub>2</sub>GaC powder.

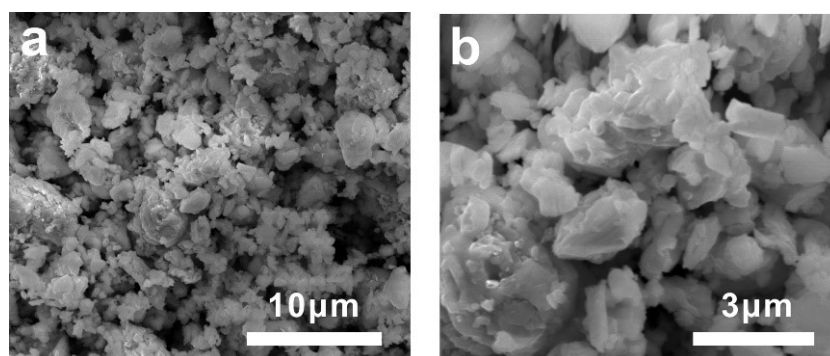

**Fig. S6** SEM images of Nb<sub>2</sub>AlC powder.

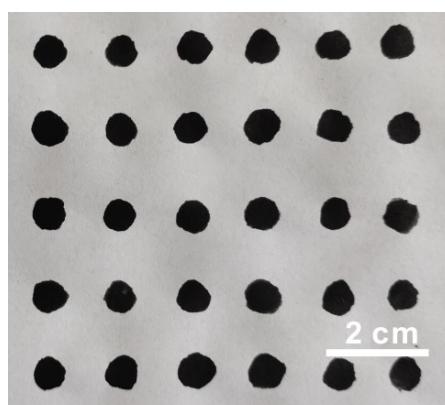

**Fig. S7** The photographs of as-drawn arrays on paper by using Nb<sub>2</sub>C MXene ink.

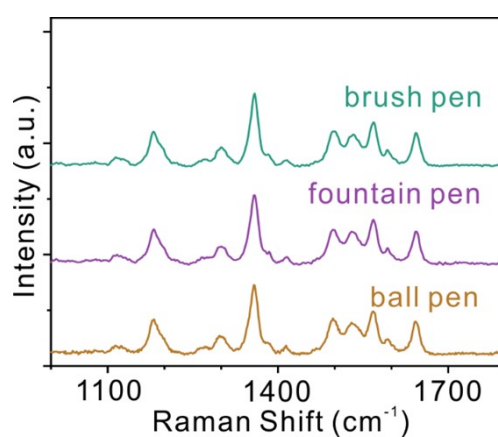

**Fig. S8** Raman spectra of R6G ( $1 \times 10^{-5}$  M) adsorbed on the handwritten Ti<sub>2</sub>C substrates using ball pen, fountain pen, and brush pen.

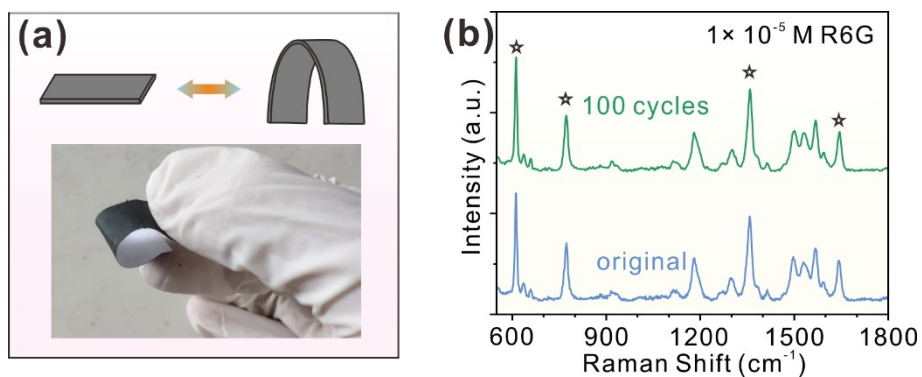

**Fig. S9** (a) Schematic illustration of the bending deformation. (b) Raman spectra of R6G ( $1 \times 10^{-5}$  M) adsorbed on the flexible MXene substrate after 100 cycles of bending-releasing.

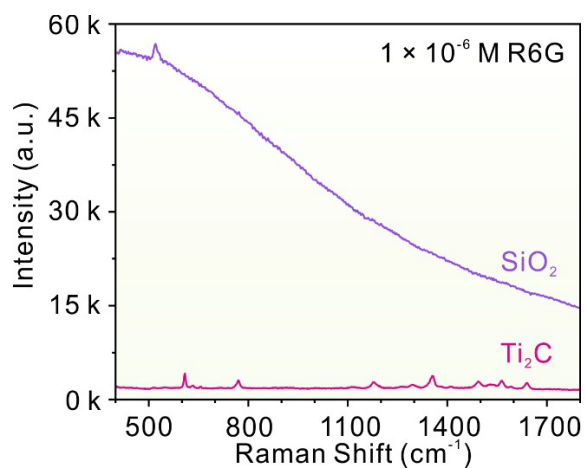

**Fig. S10** Raman spectra of R6G ( $1 \times 10^{-6}$  M) adsorbed on  $\text{SiO}_2$  and  $\text{Ti}_2\text{C}$  MXene without baseline correction.



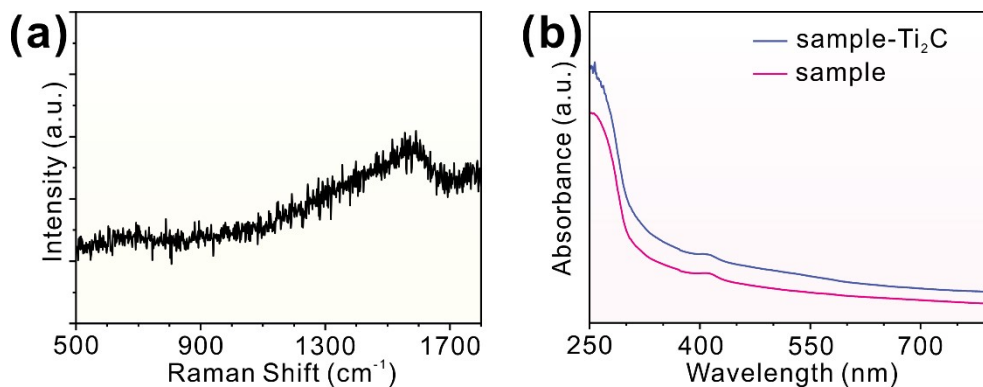

**Fig. S11** (a) SERS spectrum of fish skin without immersion treatment of fish drugs. (b) UV-vis absorption spectra of the sample from fish skin and the sample-Ti<sub>2</sub>C MXene.

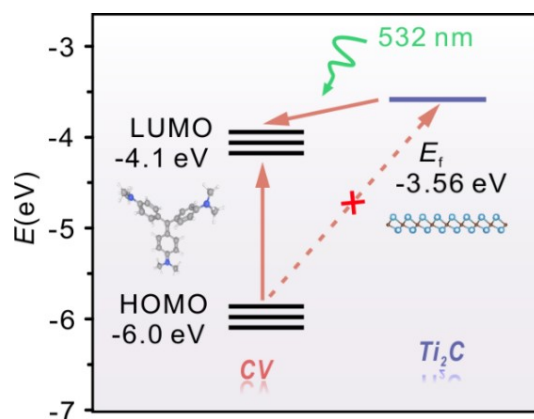

**Fig. S12** Energy level diagrams and charge transfer routes in CV-Ti<sub>2</sub>C complex.

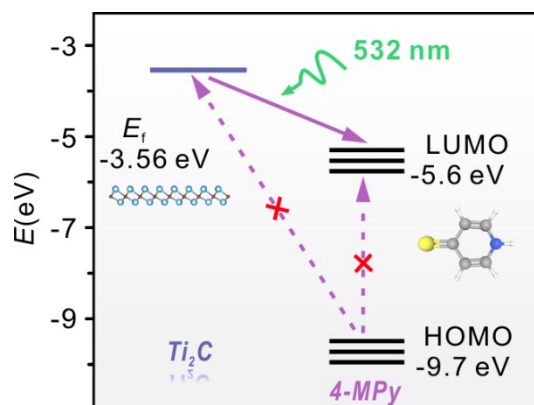

**Fig. S13** Energy level diagrams and charge transfer routes in Ti<sub>2</sub>C-4-MPy complex.

## References

- 1 X. Fan, M. Li, Q. Hao, M. Zhu, X. Hou, H. Huang, L. Ma, O. G. Schmidt, and T. Qiu, *Adv. Mater. Interfaces*, 2019, **6**, 1901133.
- 2 S. Cong, Y. Yuan, Z. Chen, J. Hou, M. Yang, Y. Su, Y. Zhang, L. Li, Q. Li, F. Geng, and Z. Zhao, *Nat. Commun.*, 2015, **6**, 7800.
